# Supplementary material for: High-Quality Conjugated Polymers Achieving Ultra-Trace Detection of Cr2O72− in Agricultural Products
Source: MDPI journal article supplement (doi:10.3390/molecules27134294), 2022-07-04
Supplement: s1 [file s1]

## Supplementary Material

### **High-quality conjugated polymers achieving ultra-trace detection of $\text{Cr}_2\text{O}_7^{2-}$ in agricultural products**

Hui Li<sup>1‡</sup>, Fei Li<sup>1‡</sup>, Fang Liu<sup>1</sup>, Xiao Chen<sup>2</sup>, Wenyuan Xu<sup>2</sup>, Liang Shen<sup>2</sup>, Jingkun Xu<sup>3,4,\*</sup>, Rui Yang<sup>5,\*</sup>, Ge Zhang<sup>2,\*</sup>

<sup>1</sup>School of Pharmacy, Jiangxi Science & Technology Normal University, Nanchang 330013, P. R. China

<sup>2</sup>School of Chemistry & Chemical Engineering, Jiangxi Science & Technology Normal University, Nanchang 330013, P. R. China

<sup>3</sup>Jiangxi Key Lab of Flexible Electronics, Flexible Electronics Innovation Institute, Jiangxi Science & Technology Normal University, Nanchang 330013, Jiangxi, P.R. China

<sup>4</sup>College of Chemistry and Molecular Engineering, Qingdao University of Science & Technology, Qingdao 266042, P. R. China

<sup>5</sup>School of Electronics and Information Engineering, Changshu Institute of Technology, Changshu, 215500, China

\*Address correspondence to E-mail: zhangge20082006@126.com (G. Zhang).

xujingkun1971@yeah.net (J. Xu)

yangruithrive@163.com (R. Yang)

<sup>‡</sup>These authors contributed equally to this work.

**Table S1** Polymerization of monomers Fmoc-Ala-OH and Fmoc-Thr-OH in different solvents.

| Polymerization<br>Monomers | THF | DMF | DCM | BFEE |
|----------------------------|-----|-----|-----|------|
|                            |     |     |     |      |
| Fmoc-Ala-OH                | ×   | ×   | ×   | √    |
| Fmoc-Thr-OH                | ×   | ×   | ×   | √    |

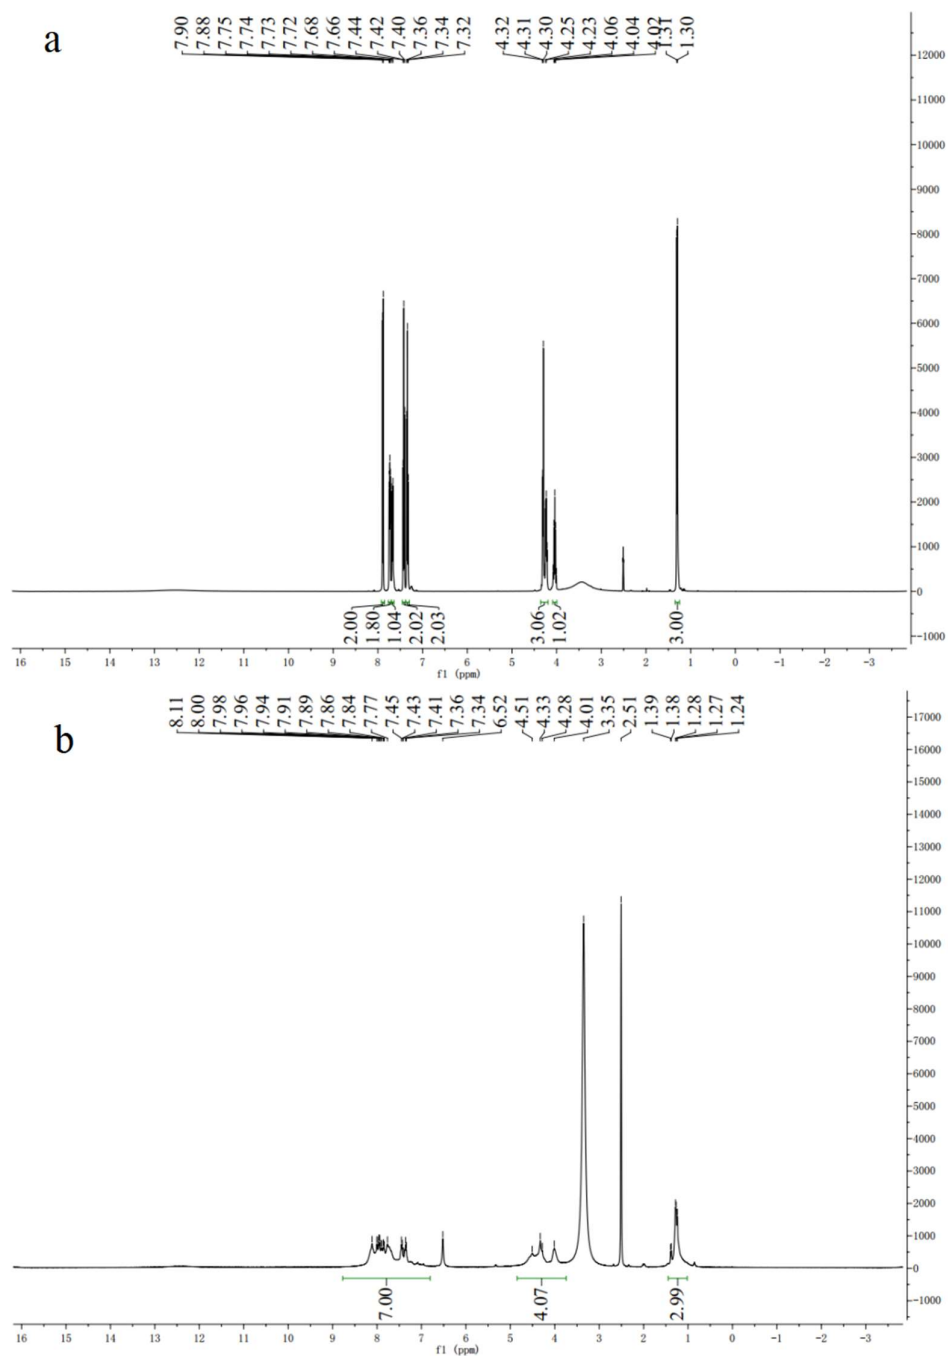

**Figure S1.**  $^1\text{H}$  NMR spectra of Fmoc-Ala-OH (a) and **P**(Fmoc-Ala-OH) (b).

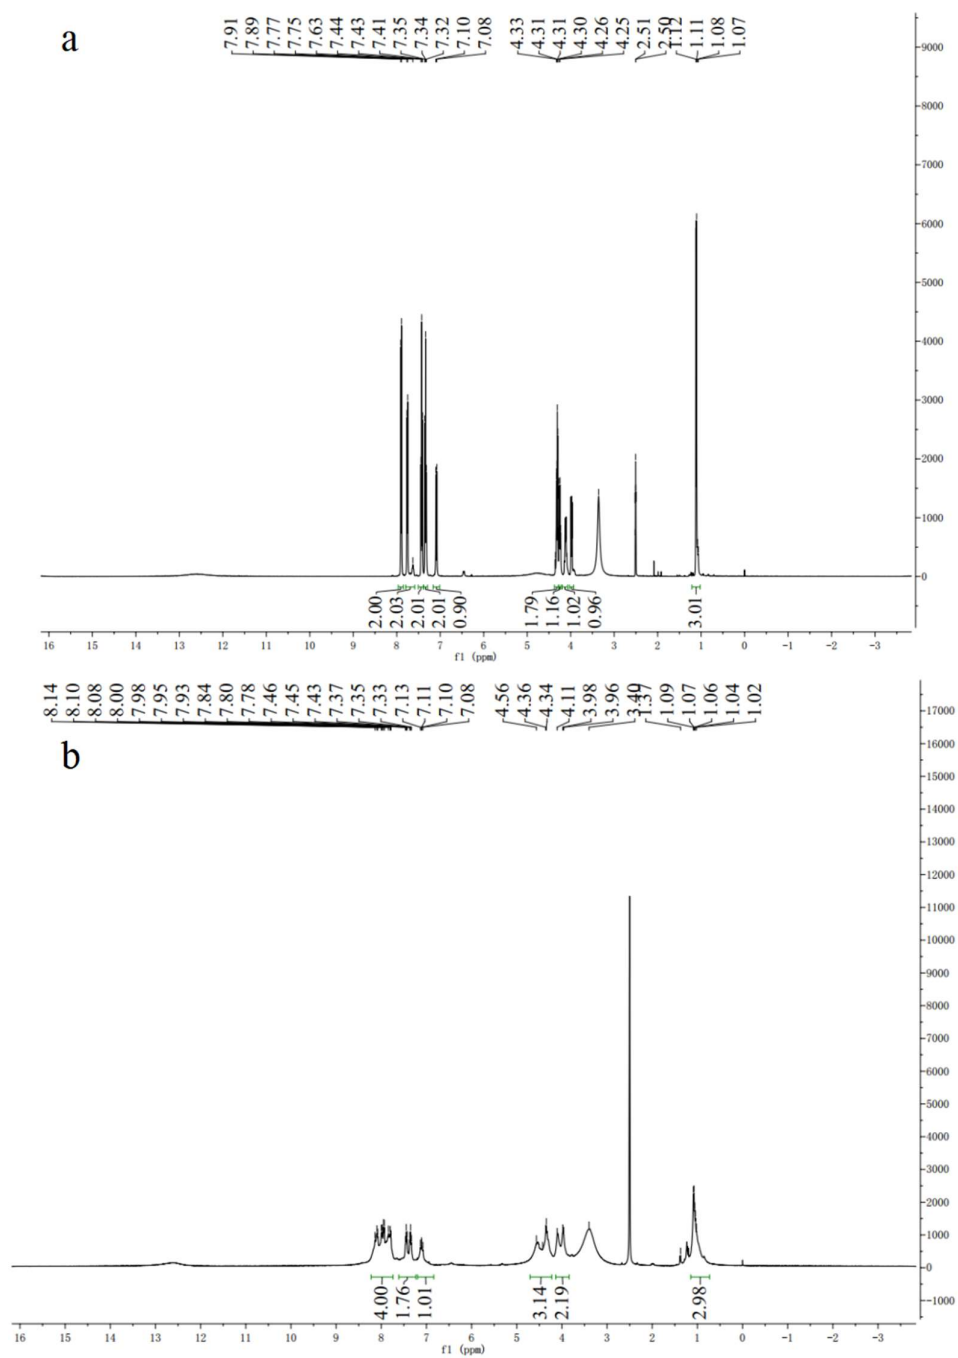

**Figure S2.**  $^1\text{H}$  NMR spectra of Fmoc-Thr-OH (a) and **P(Fmoc-Thr-OH)** (b).

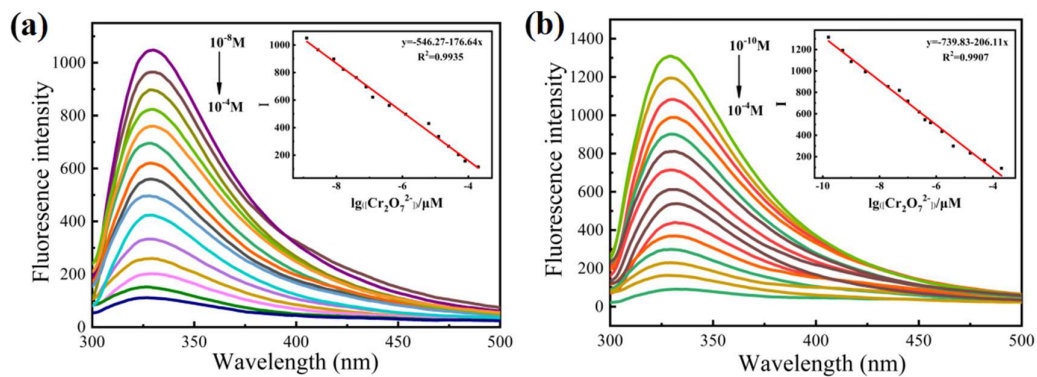

**Figure S3.** Fluorescence spectra of Fmoc-Ala-OH (a) and Fmoc-Thr-OH (b) toward  $\text{Cr}_2\text{O}_7^{2-}$  with different concentrations in DMSO/EtOH solution. Inset: linear plots of their fluorescence intensity against the  $\text{Cr}_2\text{O}_7^{2-}$  concentration.
